# Supplementary material for: The restart effect in social dilemmas shows humans are self-interested not altruistic
Source: PubMed Central journal article supplement — Proc Natl Acad Sci U S A. 2022 Dec 2;119(49):e2210082119. doi: 10.1073/pnas.2210082119 (PMC9894210; doi:10.1073/pnas.2210082119), 2022-12-02
Supplement: pnas.2210082119.sapp.pdf [file pnas.2210082119.sapp.pdf]

**Supporting Information (SI) for: The restart effect in social dilemmas shows humans are self-interested not altruistic**

Maxwell N. Burton-Chellew\*<sup>1-2</sup>

<sup>1</sup> Department of Economics, HEC-University of Lausanne, 1015 Lausanne, Switzerland

<sup>2</sup> Department of Ecology and Evolution, University of Lausanne, 1015 Lausanne, Switzerland.

\*Corresponding author: [maxwell.burton@unil.ch](mailto:maxwell.burton@unil.ch)

maxburtonchellew.com

**Classifications**

**Biological Sciences: Evolution**

**Social Sciences: Economic Sciences**

**Contents:**

Supplementary Table 1

Supplementary Figure 1

**Supplementary Table 1:** Results of separate paired t-tests performed on group mean contributions for each treatment and depending on the level of information shown to participants during the first game.

| <b>Restart treatment</b> | <b>Prior game information</b> | <b>Finish (MU)</b> | <b>Restart (MU)</b> | <b>n groups</b> | <b>t</b> | <b>p</b> |
|--------------------------|-------------------------------|--------------------|---------------------|-----------------|----------|----------|
| Classic Replay           | Individual decisions          | 5.7                | 8.7                 | 5               | 2.29     | 0.084    |
|                          | Group average                 | 4.1                | 7.0                 | 5               | 2.55     | 0.063    |
|                          | Payoffs only                  | 5.2                | 9.2                 | 10              | 5.35     | <0.001   |
|                          | Overall                       | 5.1                | 8.5                 | 20              | 6.28     | <0.001   |
| Blind Replay             | Individual decisions          | 5.2                | 4.7                 | 5               | 0.31     | 0.769    |
|                          | Group average                 | 2.4                | 2.4                 | 5               | 0.00     | 1.000    |
|                          | Payoffs only                  | 3.5                | 4.5                 | 10              | 1.23     | 0.249    |
|                          | Overall                       | 3.6                | 4.0                 | 20              | 0.68     | 0.504    |
| Computer Replay          | Individual decisions          | 3.6                | 9.1                 | 5               | 3.59     | 0.023    |
|                          | Group average                 | 4.4                | 4.1                 | 5               | 0.14     | 0.892    |
|                          | Payoffs only                  | 3.2                | 6.3                 | 10              | 3.00     | 0.015    |
|                          | Overall                       | 3.6                | 6.4                 | 20              | 3.14     | 0.005    |
| Computer Rewind          | Individual decisions          | 6.0                | 4.1                 | 5               | 1.81     | 0.145    |
|                          | Group average                 | 4.5                | 3.8                 | 5               | 0.63     | 0.561    |
|                          | Payoffs only                  | 3.2                | 3.6                 | 10              | 0.37     | 0.723    |
|                          | Overall                       | 4.2                | 3.8                 | 20              | 0.71     | 0.483    |

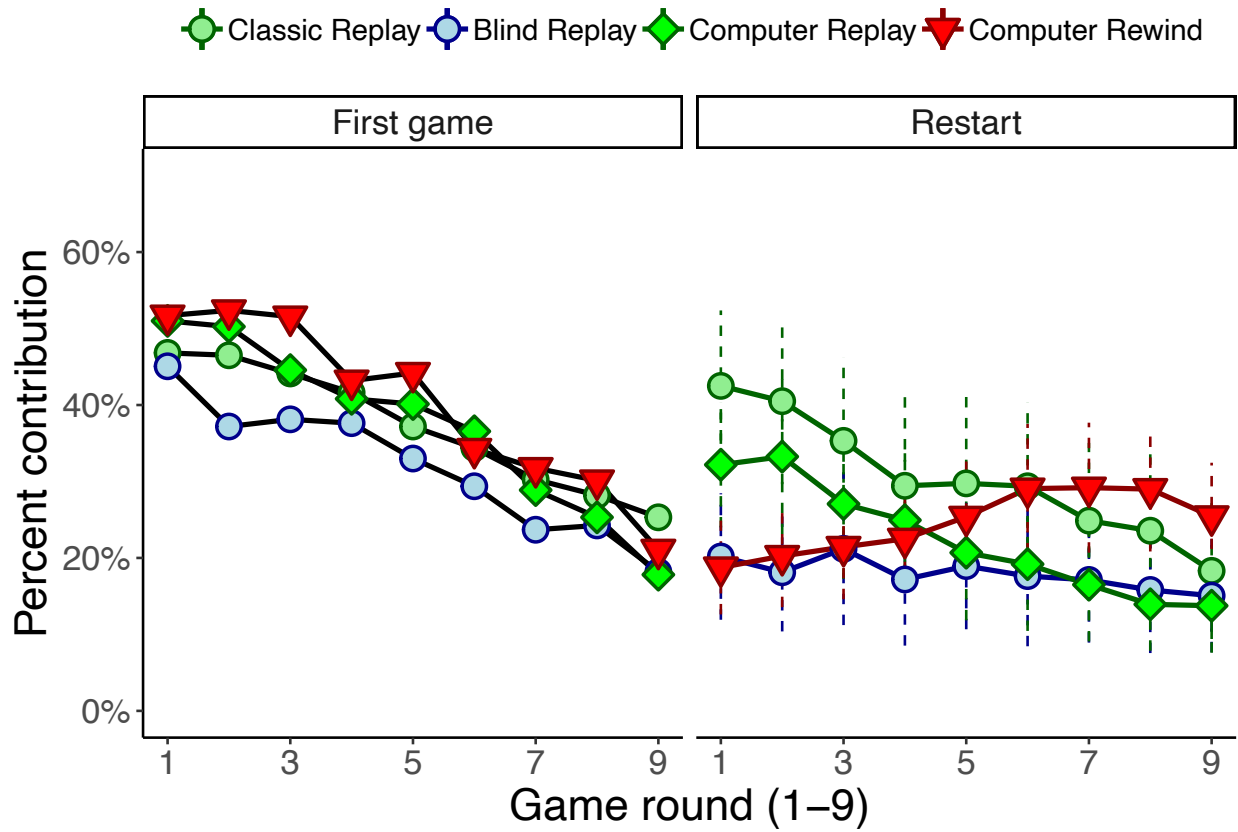

**Supplementary Figure 1.** This is the same as Figure in the manuscript but shows the behaviour in the first game of those later on randomly assigned to each treatment.
